# Supplementary material for: Lack of association of rare functional variants in TSC1/TSC2 genes with autism spectrum disorder
Source: PubMed Central journal article supplement (PMC3610211; doi:10.1186/2040-2392-4-5), 2013-03-20

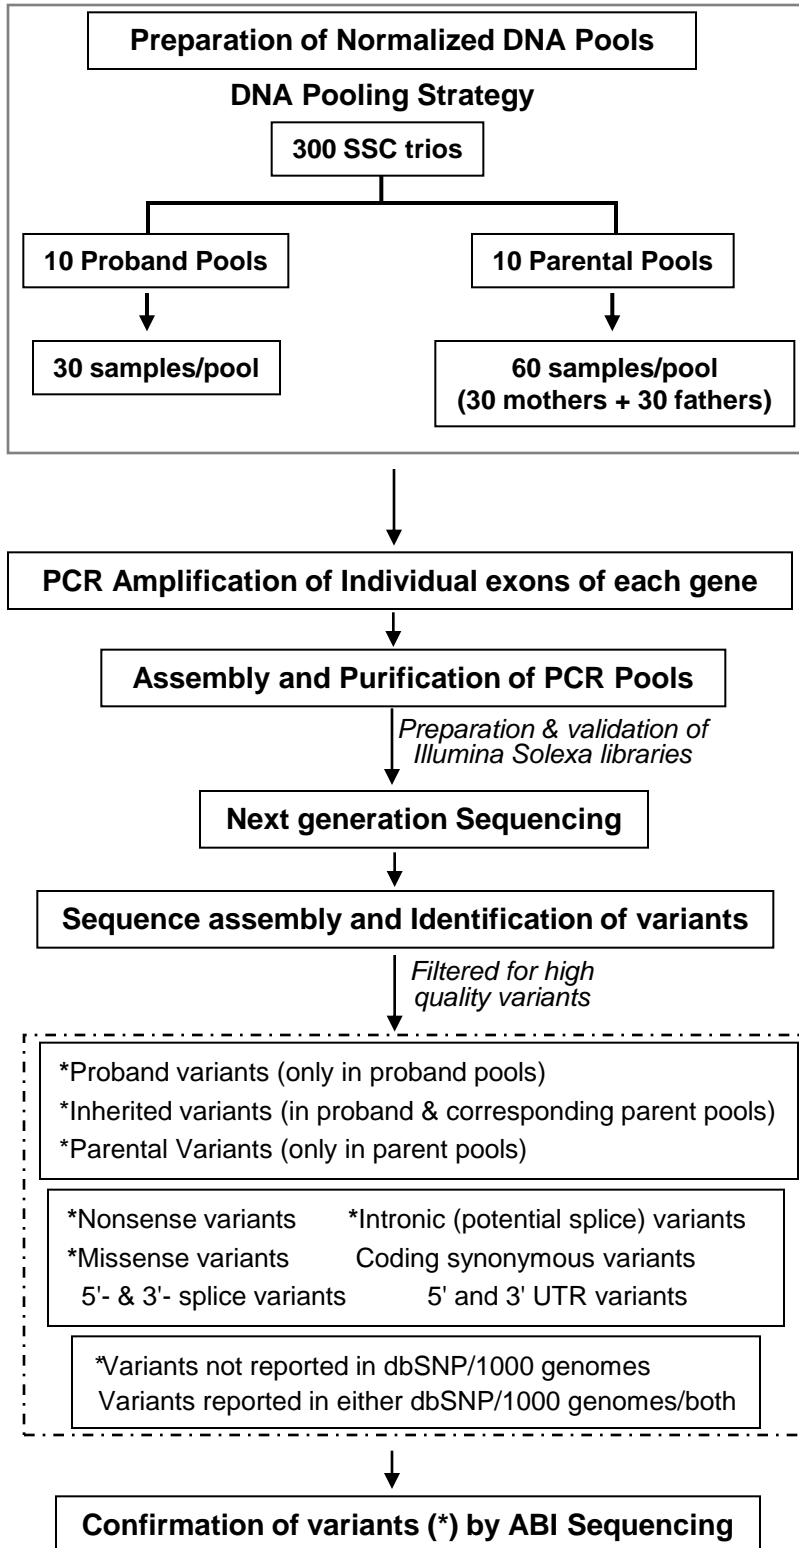

Supplement: 2040-2392-4-5-S2.pdf [file 2040-2392-4-5-S2.pdf]
