# Supplementary material for: Lack of association of rare functional variants in TSC1/TSC2 genes with autism spectrum disorder
Source: Mol Autism. 2013 Mar 20;4:5. doi: 10.1186/2040-2392-4-5 (PMC3610211; doi:10.1186/2040-2392-4-5)
Supplement: Additional file 1: Table S1 — Families from the Simons Simplex Collection used in the study. SSC family IDs for all the 300 ASD trios including affected probands and unaffected parents are provided. [file 2040-2392-4-5-S1.xls]

## Sheet: Sheet1
Table S1. Families from the Simons Simplex Collection used in the study
11000	11059	11120	11192	11275	11372	11446	11509	11579	11681
11002	11061	11121	11193	11276	11376	11450	11510	11581	11685
11003	11062	11122	11195	11280	11378	11452	11511	11587	11689
11006	11063	11129	11196	11284	11379	11453	11512	11590	11693
11007	11066	11130	11197	11285	11382	11454	11513	11592	11694
11010	11067	11132	11198	11290	11393	11455	11517	11596	11698
11013	11069	11133	11201	11291	11399	11456	11520	11598	11700
11014	11071	11134	11202	11293	11400	11457	11523	11599	11707
11016	11073	11138	11203	11294	11405	11458	11529	11600	11710
11017	11074	11141	11206	11300	11406	11459	11532	11610	11711
11022	11075	11145	11207	11301	11409	11461	11533	11612	11712
11024	11076	11146	11208	11303	11410	11466	11537	11619	11714
11028	11077	11149	11214	11307	11411	11468	11538	11620	11720
11029	11080	11150	11216	11316	11412	11469	11543	11625	11723
11030	11085	11156	11219	11323	11413	11470	11544	11627	11724
11031	11086	11157	11220	11325	11415	11473	11546	11633	11731
11032	11087	11165	11225	11327	11417	11474	11549	11634	11734
11038	11089	11167	11232	11328	11418	11475	11550	11638	11736
11039	11090	11168	11233	11336	11420	11479	11554	11641	11740
11040	11091	11173	11241	11337	11424	11482	11555	11642	11756
11041	11097	11174	11242	11338	11425	11484	11557	11644	11762
11045	11098	11178	11244	11341	11426	11485	11563	11645	11765
11046	11099	11179	11251	11342	11428	11488	11565	11657	11766
11049	11102	11180	11255	11345	11429	11489	11567	11659	11768
11050	11106	11181	11260	11347	11433	11490	11571	11664	11775
11053	11109	11186	11262	11348	11437	11491	11572	11666	11776
11054	11110	11188	11263	11353	11441	11498	11573	11667	11780
11055	11113	11189	11265	11360	11442	11499	11575	11673	11781
11056	11114	11190	11271	11364	11443	11501	11577	11677	11788
11057	11118	11191	11274	11365	11445	11502	11578	11679	11797
Proband, father and mother samples were used from these families
